# Supplementary material for: Genome-wide identification and characterization of heat shock protein family 70 provides insight into its divergent functions on immune response and development of Paralichthys olivaceus
Source: PeerJ. 2019 Nov 11;7:e7781. doi: 10.7717/peerj.7781 (PMC6855204; doi:10.7717/peerj.7781)
Supplement: Table S2 — NP, number of estimated parameters. LnL, log likelihood score. LRT P < 0.5 indicates the positive selection gene. Positively selective site > 0.95 indicates positive selection site (significance level: *, 0.05; **, 0.01). [file peerj-07-7781-s002.xlsx]

## Sheet: Sheet1
Table S2 Similarity Statistics of hsp70 in studied fish
Zebrafish Gene ID	Zebrafish Gene Symbols	Japanese flounder Gene ID	Ensembl Gene symbols	Gene Symbols in this study	Identities（%）
ENSDARG00000012381.8	hsc70	N_000000245.1	na	hsc70	92.96
ENSDARG00000029688.8	hsp70.1	N_000000243.1	na	hspa1a	86.47
		N_000000250.1	na	hspa1b	86.2
ENSDARG00000004754.10	hspa4a	N_000000247.1	na	hspa4a	78.86
ENSDARG00000018989.6	hspa4b	N_000000236.1	na	hspa4b	81.07
ENSDARG00000053544.6	hspa4l	N_000000241.1	na	hspa4l	77.51
ENSDARG00000103846.2	hspa5	N_000000244.1	na	hspa5	94.49
ENSDARG00000068992.4	hspa8	N_000000238.1	na	hspa8a	96.41
ENSDARG00000037403.5	hspa8b	N_000000239.1	na	hspa8b	94.61
ENSDARG00000003035.9	hspa9	N_000000246.1	na	hspa9	84.81
ENSDARG00000030307.8	hspa12b	N_000000237.1	na	hspa12a	63.58
		N_000000248.1	na	hspa12b	85.21
ENSDARG00000040984.6	hspa13	N_000000242.1	na	hspa13	80.09
ENSDARG00000058030.7	hspa14	N_000000249.1	na	hspa14	75.6
ENSDARG00000003035.9	hyou1	N_000000240.1	na	hyou1	83.82
Zebrafish Gene ID	Zebrafish Gene Symbols	Tilapia Gene ID	Ensembl Gene symbols	Gene Symbols in this study	Identities（%）
ENSDARG00000012381.8	hsc70	ENSONIG00000002734.1	hsc70	hsc70	94.61
ENSDARG00000056210.6	hspa1b	ENSONIG00000020829.1	HSPA1A	hspa1a	89.95
ENSDARG00000004754.10	hspa4a	ENSONIG00000008454.1	hspa4a	hspa4a	78.67
ENSDARG00000018989.6	hspa4b	ENSONIG00000012895.1	hspa4b	hspa4b	83.1
ENSDARG00000053544.6	hspa4l	ENSONIG00000020135.1	hspa4l	hspa4l	78.15
ENSDARG00000103846.2	hspa5	ENSONIG00000001651.1	na	hspa5	80.5
		ENSONIG00000002826.1	hspa5	hspa5	94.27
		ENSONIG00000012430.1	hspa5	hspa5	79.37
		ENSONIG00000012434.1	hspa5	hspa5	83.19
		ENSONIG00000012446.1	hspa5	hspa5	83.15
		ENSONIG00000012454.1	hspa5	hspa5	80.19
		ENSONIG00000012461.1	hspa5	hspa5	82.13
		ENSONIG00000012462.1	na	hspa5	81.95
ENSDARG00000068992.4	hspa8	ENSONIG00000004759.1	dkey-4p15.3	hspa8a	97.22
		ENSONIG00000011144.1	HSPA8	hspa8b	95.75
ENSDARG00000003035.9	hspa9	ENSONIG00000004081.1	HSPA9	hspa9	90.73
ENSDARG00000030307.8	hspa12b	ENSONIG00000013570.1	hspa12b	hspa12b	84.37
		ENSONIG00000009140.1	hspa12a	hspa12a	63.91
ENSDARG00000040984.6	hspa13	ENSONIG00000005214.1	hspa13	hspa13	82.69
ENSDARG00000058030.7	hspa14	ENSONIG00000014177.1	hspa14	hspa14	70.02
ENSDARG00000013670.10	hyou1	ENSONIG00000004764.1	hyou1	hyou1	75.92
Zebrafish Gene ID	Zebrafish Gene Symbols	Medaka Gene ID	Ensembl Gene symbols	Gene Symbols in this study	Identities（%）
ENSDARG00000012381.8	hsc70	ENSORLG00000006386.1	hsp70-3	hsc70	94.12
ENSDARG00000055723.5	hsp70l	ENSORLG00000000233.1	hsp70.1	hspa1a	88.65
ENSDARG00000056210.6	hspa1b	ENSORLG00000006132.1	hsp70-5	hspa1b	87.93
ENSDARG00000004754.10	hspa4a	ENSORLG00000001448.1	hspa4a	hspa4a	77.61
ENSDARG00000018989.6	hspa4b	ENSORLG00000005958.1	hspa4b	hspa4b	79.81
ENSDARG00000053544.6	hspa4l	ENSORLG00000015961.1	hspa4l	hspa4l	73.2
ENSDARG00000103846.2	hspa5	ENSORLG00000006886.1	hspa5	hspa5	94.65
ENSDARG00000068992.4	hspa8	ENSORLG00000013520.1	na	hspa8a	97.56
ENSDARG00000037403.5	hspa8b	ENSORLG00000005316.1	dkey-4p15.3	hspa8b	93.96
ENSDARG00000003035.9	hspa9	ENSORLG00000010637.1	hspa9	hspa9	75.15
ENSDARG00000030307.8	hspa12b	ENSORLG00000005839.1	hspa12b	hspa12b	85.48
		ENSORLG00000001174.1	hspa12a	hspa12a	63.2
ENSDARG00000040984.6	hspa13	ENSORLG00000014216.1	hspa13	hspa13	80.18
ENSDARG00000058030.7	hspa14	ENSORLG00000012603.1	spa14	hspa14	69.76
Zebrafish Gene ID	Zebrafish Gene Symbols	Platyfish Gene ID	Ensembl Gene symbols	Gene Symbols in this study	Identities（%）
ENSDARG00000012381.8	hsc70	ENSXMAG00000010572.1	na	hsc70	94.61
ENSDARG00000055723.5	hsp70l	ENSXMAG00000010876.1	hsc70	hspa1a	83.51
ENSDARG00000056210.6	hspa1b	ENSXMAG00000020191.1	hsc70	hspa1b	87.15
ENSDARG00000004754.10	hspa4a	ENSXMAG00000001608.1	hspa4a	hspa4a	78.91
ENSDARG00000018989.6	hspa4b	ENSXMAG00000009200.1	hspa4b	hspa4b	82.05
ENSDARG00000053544.6	hspa4l	ENSXMAG00000013555.1	hspa4l	hspa4l	77.08
ENSDARG00000103846.2	hspa5	ENSXMAG00000005672.1	na	hspa5	96.15
ENSDARG00000068992.4	hspa8	ENSXMAG00000001602.1	na	hspa8a	97.06
ENSDARG00000037403.5	hspa8b	ENSXMAG00000001728.1	hsc70	hspa8b	93.46
ENSDARG00000003035.9	hspa9	ENSXMAG00000004114.1	HSPA9	hspa9	90.29
ENSDARG00000030307.8	hspa12b	ENSXMAG00000008789.1	hspa12b	hspa12b	85.31
		ENSXMAG00000005923.1	hspa12a	hspa12a	63.54
ENSDARG00000040984.6	hspa13	ENSXMAG00000010122.1	hspa13	hspa13	77.83
ENSDARG00000058030.7	hspa14	ENSXMAG00000005002.1	hspa14	hspa14	66.98
ENSDARG00000013670.10	hyou1	ENSXMAG00000001626.1	hyou1	hyou1	82.47
Zebrafish Gene ID	Zebrafish Gene Symbols	Tetraodon Gene ID	Ensembl Gene symbols	Gene Symbols in this study	Identities（%）
ENSDARG00000012381.8	hsc70	ENSTNIG00000018473.1	hsc70	hsc70	94.93
ENSDARG00000021924.8	hsp70.3	ENSTNIG00000004281.1	HSPA1A	hspa1a	87.4
ENSDARG00000018989.6	hspa4b	ENSTNIG00000008942.1	hspa4b	hspa4b	81.53
ENSDARG00000053544.6	hspa4l	ENSTNIG00000017360.1	hspa4l	hspa4l	73.6
ENSDARG00000103846.2	hspa5	ENSTNIG00000018747.1	hspa5	hspa5	93.85
ENSDARG00000068992.4	hspa8	ENSTNIG00000008602.1	key-4p15.3	hspa8a	96.9
ENSDARG00000003035.9	hspa9	ENSTNIG00000005994.1	hspa9	hspa9	76.48
ENSDARG00000040984.6	hspa13	ENSTNIG00000006180.1	hspa13	hspa13	72.21
ENSDARG00000013670.10	hyou1	ENSTNIG00000008598.1	hyou1	hyou1	84.68
Zebrafish Gene ID	Zebrafish Gene Symbols	Stickleback Gene ID	Ensembl Gene symbols	Gene Symbols in this study	Identities（%）
ENSDARG00000012381.8	hsc70	ENSGACG00000007569.1	hsc70	hsc70	93.95
ENSDARG00000021924.8	hsp70.3	ENSGACG00000013046.1	ch211-199o1.2	hspa1	87.09
		ENSGACG00000013048.1	HSPA1A	hspa1a	86.94
		ENSGACG00000013051.1	na	hspa1	87.09
		ENSGACG00000013055.1	na	hspa1	87.09
ENSDARG00000056210.6	hspa1b	ENSGACG00000007903.1	na	hspa1b	89.34
ENSDARG00000004754.10	hspa4a	ENSGACG00000020732.1	hspa4a	hspa4a	75.94
ENSDARG00000018989.6	hspa4b	ENSGACG00000018188.1	hspa4b	hspa4b	79.22
ENSDARG00000053544.6	hspa4l	ENSGACG00000008210.1	hspa4l	hspa4l	73
ENSDARG00000103846.2	hspa5	ENSGACG00000016633.1	hspa5	hspa5	94.65
ENSDARG00000068992.4	hspa8	ENSGACG00000020117.1	dkey-4p15.3	hspa8a	96.08
ENSDARG00000037403.5	hspa8b	ENSGACG00000010517.1	HSPA8	hspa8b	94.12
ENSDARG00000003035.9	hspa9	ENSGACG00000019542.1	HSPA9	hspa9	89.26
ENSDARG00000030307.8	hspa12b	ENSGACG00000019861.1	hspa12b	hspa12b	84.2
		ENSGACG00000014625.1	hspa12a	hspa12a	63.72
ENSDARG00000040984.6	hspa13	ENSGACG00000006344.1	hspa13	hspa13	78.18
ENSDARG00000058030.7	hspa14	ENSGACG00000019293.1	hspa14	hspa14	74.6
ENSDARG00000013670.10	hyou1	ENSGACG00000020113.1	hyou1	hyou1	83.65
Zebrafish Gene ID	Zebrafish Gene Symbols	Zebrafish Gene ID	Ensembl Gene symbols	Gene Symbols in this study	Identities（%）
ENSDARG00000012381.8	hsc70	ENSDARG00000012381.8	hsc70	hsc70	na
ENSDARG00000055723.5	hsp70l	ENSDARG00000055723.5	hsp70l	hspa1	na
ENSDARG00000029688.8	hsp70.1	ENSDARG00000029688.8	hsp70.1	hspa1	na
ENSDARG00000092362.3	hsp70.2	ENSDARG00000092362.3	hsp70.2	hspa1	na
ENSDARG00000021924.8	hsp70.3	ENSDARG00000021924.8	hsp70.3	hspa1	na
ENSDARG00000056210.6	hspa1b	ENSDARG00000056210.6	hspa1b	hspa1b	na
ENSDARG00000004754.10	hspa4a	ENSDARG00000004754.10	hspa4a	hspa4a	na
ENSDARG00000018989.6	hspa4b	ENSDARG00000018989.6	hspa4b	hspa4b	na
ENSDARG00000053544.6	hspa4l	ENSDARG00000053544.6	hspa4l	hspa4l	na
ENSDARG00000103846.2	hspa5	ENSDARG00000103846.2	hspa5	hspa5	na
ENSDARG00000037403.5	hspa8b	ENSDARG00000037403.5	hspa8b	hspa8b	na
ENSDARG00000068992.4	hspa8	ENSDARG00000068992.4	hspa8	hspa8a	na
ENSDARG00000003035.9	hspa9	ENSDARG00000003035.9	hspa9	hspa9	na
ENSDARG00000068869.5	hsp12a.1	ENSDARG00000068869.5	hsp12a.1	hsp12a.1	na
ENSDARG00000096726.2	hsp12a.2	ENSDARG00000096726.2	hsp12a.2	hsp12a.2	na
ENSDARG00000030307.8	hspa12b	ENSDARG00000030307.8	hspa12b	hspa12b	na
ENSDARG00000040984.6	hspa13	ENSDARG00000040984.6	hspa13	hspa13	na
ENSDARG00000058030.7	hspa14	ENSDARG00000058030.7	hspa14	hspa14	na
ENSDARG00000013670.10	hyou1	ENSDARG00000013670.10	hyou1	hyou1	na
PS: The protein sequence of zebrafish from ftp://ftp.ensembl.org/pub/release-90/fasta/danio_rerio/pep/Danio_rerio.GRCz10.pep.all.fa.gz
Some gene smybols are re-named after manul corrections
